# Supplementary material for: Knowledge and Confidence Among Five Cohorts of Faculty Learners in a Point of Care Ultrasound (POCUS) Program: Factors Defining Learner Success
Source: PubMed Central journal article supplement (PMC11616799; doi:10.24908/pocus.v9i2.17640), 2024-11-15
Supplement: pocusj-09-02-17640-s001.pdf [file pocusj-09-02-17640-s001.pdf]

# ISCAN combined Knowledge Test and Survey

---

## Start of Block: ISCAN survey

Q1 intro A link to the answer key will be included at the conclusion of the survey.

---

Q2 acquire How confident are you in your ability to **ACQUIRE** ultrasound images of the:

|                      | Not at all confident (1) | Only a little confident (2) | Somewhat confident (3) | Very confident (4)    |
|----------------------|--------------------------|-----------------------------|------------------------|-----------------------|
| Heart (1)            | <input type="radio"/>    | <input type="radio"/>       | <input type="radio"/>  | <input type="radio"/> |
| Lungs (2)            | <input type="radio"/>    | <input type="radio"/>       | <input type="radio"/>  | <input type="radio"/> |
| Abdominal organs (3) | <input type="radio"/>    | <input type="radio"/>       | <input type="radio"/>  | <input type="radio"/> |
| Deep Veins (4)       | <input type="radio"/>    | <input type="radio"/>       | <input type="radio"/>  | <input type="radio"/> |
| Knee (5)             | <input type="radio"/>    | <input type="radio"/>       | <input type="radio"/>  | <input type="radio"/> |

---

Q3 interpret How confident are you in your ability to **INTERPRET** ultrasound images of the:

|                      | Not at all confident (1) | Only a little confident (2) | Somewhat confident (3) | Very confident (4)    |
|----------------------|--------------------------|-----------------------------|------------------------|-----------------------|
| Heart (1)            | <input type="radio"/>    | <input type="radio"/>       | <input type="radio"/>  | <input type="radio"/> |
| Lungs (2)            | <input type="radio"/>    | <input type="radio"/>       | <input type="radio"/>  | <input type="radio"/> |
| Abdominal organs (3) | <input type="radio"/>    | <input type="radio"/>       | <input type="radio"/>  | <input type="radio"/> |
| Deep Veins (4)       | <input type="radio"/>    | <input type="radio"/>       | <input type="radio"/>  | <input type="radio"/> |
| Knee (5)             | <input type="radio"/>    | <input type="radio"/>       | <input type="radio"/>  | <input type="radio"/> |

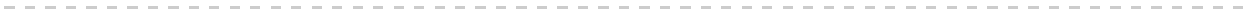

Q4 evaluate How likely are you to use US to evaluate:

|                            | Not at all likely<br>(1) | Only a little<br>likely (2) | Somewhat likely<br>(3) | Very likely (4)       |
|----------------------------|--------------------------|-----------------------------|------------------------|-----------------------|
| Dyspnea (1)                | <input type="radio"/>    | <input type="radio"/>       | <input type="radio"/>  | <input type="radio"/> |
| Abdominal pain<br>(2)      | <input type="radio"/>    | <input type="radio"/>       | <input type="radio"/>  | <input type="radio"/> |
| Hypotension (3)            | <input type="radio"/>    | <input type="radio"/>       | <input type="radio"/>  | <input type="radio"/> |
| Volume status<br>(4)       | <input type="radio"/>    | <input type="radio"/>       | <input type="radio"/>  | <input type="radio"/> |
| DVT (5)                    | <input type="radio"/>    | <input type="radio"/>       | <input type="radio"/>  | <input type="radio"/> |
| Cellulitis (6)             | <input type="radio"/>    | <input type="radio"/>       | <input type="radio"/>  | <input type="radio"/> |
| Knee infusion (7)          | <input type="radio"/>    | <input type="radio"/>       | <input type="radio"/>  | <input type="radio"/> |
| Ascites (8)                | <input type="radio"/>    | <input type="radio"/>       | <input type="radio"/>  | <input type="radio"/> |
| Acute kidney<br>injury (9) | <input type="radio"/>    | <input type="radio"/>       | <input type="radio"/>  | <input type="radio"/> |

-----

Q5 procedure Click to write the question text

|                        | All procedures<br>(1) | Only for<br>challenging<br>procedures (2) | I don't perform<br>this procedure<br>(3) | I don't use US<br>for this<br>procedure (4) |
|------------------------|-----------------------|-------------------------------------------|------------------------------------------|---------------------------------------------|
| Venipuncture (1)       | <input type="radio"/> | <input type="radio"/>                     | <input type="radio"/>                    | <input type="radio"/>                       |
| Lumbar<br>puncture (2) | <input type="radio"/> | <input type="radio"/>                     | <input type="radio"/>                    | <input type="radio"/>                       |
| Paracentesis (3)       | <input type="radio"/> | <input type="radio"/>                     | <input type="radio"/>                    | <input type="radio"/>                       |
| Peripheral IV (4)      | <input type="radio"/> | <input type="radio"/>                     | <input type="radio"/>                    | <input type="radio"/>                       |
| Thoracentesis<br>(5)   | <input type="radio"/> | <input type="radio"/>                     | <input type="radio"/>                    | <input type="radio"/>                       |

---

Q6 proficiency Have you reached the level of proficiency with POCUS you have hoped to since taking the course?

- No (1)
  - Partly (2)
  - Yes (3)
-

Q7 influence What influenced your proficiency in learning POCUS?

|                                                                                | Was a major barrier (1) | Was somewhat of a barrier (2) | Was not a barrier or facilitator (3) | Was somewhat of a facilitator (4) | Was a major facilitator (5) |
|--------------------------------------------------------------------------------|-------------------------|-------------------------------|--------------------------------------|-----------------------------------|-----------------------------|
| Access to an ultrasound machine (portable or cart-based) (1)                   | <input type="radio"/>   | <input type="radio"/>         | <input type="radio"/>                | <input type="radio"/>             | <input type="radio"/>       |
| Time to practice (2)                                                           | <input type="radio"/>   | <input type="radio"/>         | <input type="radio"/>                | <input type="radio"/>             | <input type="radio"/>       |
| Time to scan to answer a clinical question (3)                                 | <input type="radio"/>   | <input type="radio"/>         | <input type="radio"/>                | <input type="radio"/>             | <input type="radio"/>       |
| Availability of expert review of uploaded clips (4)                            | <input type="radio"/>   | <input type="radio"/>         | <input type="radio"/>                | <input type="radio"/>             | <input type="radio"/>       |
| Access to online resources (free online resources, YouTube, Twitter, etc.) (5) | <input type="radio"/>   | <input type="radio"/>         | <input type="radio"/>                | <input type="radio"/>             | <input type="radio"/>       |
| Availability of hands-on teaching on-sight with an expert (6)                  | <input type="radio"/>   | <input type="radio"/>         | <input type="radio"/>                | <input type="radio"/>             | <input type="radio"/>       |
| Access to conferences (institutional, regional, or national) (7)               | <input type="radio"/>   | <input type="radio"/>         | <input type="radio"/>                | <input type="radio"/>             | <input type="radio"/>       |

Q8 interview We are interested in better understanding what contributes to clinicians' decisions about whether or not to use POCUS. Would you be willing to be interviewed individually or in a focus group?

- No (1)
  - Yes (2)
- 

Q9 thoughts Please share any additional thoughts you have about POCUS or its use.

---

---

Q10 gender Gender

- Male (1)
  - Female (2)
  - Non-binary / third gender (3)
  - Prefer not to say (4)
- 

Q11 age Age

- 20-30 (1)
  - 31-40 (2)
  - 41-50 (3)
  - 51-60 (4)
  - >60 (5)
-

Q12 year In what year did you take the NYU POCUS course? (Choose the first course if multiple)

- 2018 (1)
  - 2019 (2)
  - 2020 (3)
  - 2021 (4)
  - 2022 (5)
  - 2023 (6)
- 

Q13 portfolio Have you completed an image portfolio?

- No (1)
  - Partially completed (2)
  - Yes (3)
- 

Q14 courses How many hours of additional formal POCUS education have you received outside of this course? Include electives, POCUS Refresher, ACP course, etc.

- 0 (1)
  - 1-5 (2)
  - 6-10 (3)
  - 11-20 (4)
  - >20 (5)
-

Q15 degree Degree

- MD/DO (attending) (1)
- PA (2)
- NP (3)
- Other - indicate below (4)

---

Q16 sepcialty What is your specialty? (general medicine, nephrology, neuro critical care, etc.)

---

Q17 years practice How many years have you been practicing in your current field?

---

Q18 practice setting Practice setting (choose all that apply)

- Inpatient (1)
- Outpatient (2)
- Critical care (3)

---



Q19 teach pocus Do you teach POCUS to others? (choose all that apply)

- Informally, as I would teach other clinical skills (1)
  - Dedicated POCUS teaching as part of a larger course (2)
  - POCUS course leadership (3)
  - I do not teach POCUS (4)
- 

Q20 learners Who are your learners (POCUS and non-POCUS related)? (choose all that apply)

- Faculty (1)
- Medical Students (2)
- Residents (3)
- Fellows (4)
- APPs (PAs, NPs) (5)
- I don't teach (6)

End of Block: ISCAN survey

---
